# Supplementary material for: The Role of Sclerostin in Rheumatic Diseases: A Review
Source: MDPI journal article supplement (doi:10.3390/jcm12196248), 2023-09-28
Supplement: s1 [file s1]

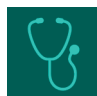

| Authors (Ref)           | Exclusion criteria                                                                                                                                                                                                                                                                                                                                                                                                                                                                                                       |
|-------------------------|--------------------------------------------------------------------------------------------------------------------------------------------------------------------------------------------------------------------------------------------------------------------------------------------------------------------------------------------------------------------------------------------------------------------------------------------------------------------------------------------------------------------------|
|                         | <b>RA</b>                                                                                                                                                                                                                                                                                                                                                                                                                                                                                                                |
| Dhakad U, et al. [48]   | <ul style="list-style-type: none"> <li>• Other autoimmune diseases,</li> <li>• secondary causes of osteoporosis (such as diabetes, celiac disease, and thyroid disease),</li> <li>• severe Vitamin D deficiency,</li> <li>• chronic liver disease,</li> <li>• chronic kidney disease stage 3 and above,</li> <li>• patients who were on medications that would possibly alter the BMD such as anticonvulsants were excluded from the study,</li> <li>• postmenopausal osteoporosis is a potential confounder.</li> </ul> |
| El-Bakry S, et al. [49] | <ul style="list-style-type: none"> <li>• Paget disease,</li> <li>• multiple myeloma,</li> <li>• breast cancer,</li> <li>• bone metastasis,</li> <li>• patients who were receiving biological treatment in the form of TNF-<math>\alpha</math> inhibitors during the last 6 months were excluded from this study.</li> </ul>                                                                                                                                                                                              |
| Singh A, et al. [50]    | <ul style="list-style-type: none"> <li>• Age less than 15 years,</li> <li>• patients on treatment of disease modifying anti rheumatic drug,</li> <li>• evidence of steroid use in past 1 month,</li> <li>• calcium supplement in last 3 months,</li> <li>• diabetes mellitus,</li> <li>• chronic kidney disease,</li> <li>• chronic liver disease.</li> </ul>                                                                                                                                                            |
| Mehaney DA, et al. [51] | <ul style="list-style-type: none"> <li>• Diabetes mellitus,</li> <li>• hyperthyroidism,</li> <li>• receiving thyroxine or calcium</li> <li>• replacement therapy or steroid therapy</li> </ul>                                                                                                                                                                                                                                                                                                                           |
| Świerkot J, et al. [52] | <ul style="list-style-type: none"> <li>• Pregnancy or breastfeeding,</li> <li>• other systemic diseases of connective tissue besides RA,</li> <li>• clinically significant impairment of hepatic and renal function,</li> <li>• alcohol abuse,</li> <li>• infection with hepatotropic viruses,</li> <li>• infections resistant to therapy,</li> <li>• history of cancer if no cure was achieved,</li> </ul>                                                                                                              |

- uncontrolled diabetes,
- patient unwilling or unable to cooperate.

Seror R, et al. [53]

- Another defined inflammatory rheumatic disease
- patients had to be free of any steroids and DMARDs (except within the 15 days before inclusion for DMARDs only).

### SLE

Fayed A, et al. [66]

- Any conditions that may cause glomerulopathy including diabetes and essential hypertension,
- atients with SLE with a history of lupus nephritis and who showed no evidence of activity.

Garcia-de los Ríos C,  
et al. [69]

- No data.

### PsA

Fassio A, et al. [74]

- Further systemic inflammatory diseases,
- active infections,
- neoplasms,
- metabolic bone diseases,
- pregnancy,
- current use of biologic therapy,
- current use of drugs known to affect bone metabolism,
- use of corticosteroids in the last 6 months.

Fassio A, et al. [75]

- Previous treatment with biologic drugs,
- other systemic inflammatory diseases,
- active infections,
- neoplasms,
- kidney, liver, endocrine or metabolic bone diseases,
- pregnancy,
- current use of biologic treatments, corticosteroids or drugs known to affect bone metabolism.

Diani M, et al. [76]

- Pregnancy,
- current or previous malignancies,
- other acute or chronic inflammatory diseases, infectious diseases (human immunodeficiency virus (HIV), hepatitis B and C, tuberculosis),
- other rheumatologic diseases,
- primary bone metabolic diseases,
- recent bone fractures (within 6 months),

---

|                               |                                                                                                                                                                                                                                                                                                                                                                                                                                        |
|-------------------------------|----------------------------------------------------------------------------------------------------------------------------------------------------------------------------------------------------------------------------------------------------------------------------------------------------------------------------------------------------------------------------------------------------------------------------------------|
|                               | <ul style="list-style-type: none"> <li>• anxiety,</li> <li>• psychosis, or depressive disorders,</li> <li>• supplementations, or particular diets (included fasting).</li> </ul>                                                                                                                                                                                                                                                       |
| Pinto Tasende JA, et al. [77] | <ul style="list-style-type: none"> <li>• Macroscopic or microscopic characteristics of the synovial membrane samples presented characteristics different from the underlying pathology (e.g., deposits of urate or PPCD crystals, pigmented villonodular synovitis or vasculitis).</li> </ul>                                                                                                                                          |
| <b>AS</b>                     |                                                                                                                                                                                                                                                                                                                                                                                                                                        |
| Appel H, et al. [84]          | <ul style="list-style-type: none"> <li>• No data.</li> </ul>                                                                                                                                                                                                                                                                                                                                                                           |
| Heiland GR, et al. [85]       | <ul style="list-style-type: none"> <li>• None of the patients was treated with tumour necrosis factor (TNF) blockers.</li> </ul>                                                                                                                                                                                                                                                                                                       |
| Saad CG, et al. [86]          | <ul style="list-style-type: none"> <li>• Other diseases that may have an effect on bone metabolism such as hyperthyroidism, malabsorption syndrome, kidney and liver failure, alcohol,</li> <li>• prior or current use of bisphosphonates,</li> <li>• current glucocorticoid use (&gt; 5 mg/day) for patients and glucocorticoid use for control group.</li> </ul>                                                                     |
| Klingberg E, et al. [87]      | <ul style="list-style-type: none"> <li>• Psoriasis,</li> <li>• inflammatory bowel disease,</li> <li>• dementia,</li> <li>• other concomitant rheumatic disease,</li> <li>• difficulties in understanding Swedish.</li> </ul>                                                                                                                                                                                                           |
| Sakellariou GT, et al. [88]   | <ul style="list-style-type: none"> <li>• Uncontrolled thyroid disease, primary or secondary hyperparathyroidism and osteoporosis,</li> <li>• severe liver or kidney disease (creatinine clearance &lt;60ml/min/1.73m<sup>2</sup>),</li> <li>• any malignancy,</li> <li>• alcohol abuse,</li> <li>• use of glucocorticoids in the previous 6 months,</li> <li>• a high in take of NSAIDs according to the recently proposed.</li> </ul> |
| Rossini M. et al. [89]        | <ul style="list-style-type: none"> <li>• Inflammatory bowel disease, clinical or laboratory evidence of hepatic, renal or bone metabolic diseases,</li> <li>• treatment with drugs known to interfere with bone or mineral metabolism, including TNF-<math>\alpha</math> blockers, glucocorticoids, and bisphosphonates.</li> </ul>                                                                                                    |
| Solmaz D, et al. [90]         | <ul style="list-style-type: none"> <li>• Uncontrolled hypertension,</li> <li>• severe hepatic and kidney disease (creatinine clearance &lt;60 mL/min),</li> <li>• severe obesity (body mass index &gt;35 kg/m<sup>2</sup>),</li> <li>• malignancy,</li> </ul>                                                                                                                                                                          |

---

---

|                             |                                                                                                                                                                                                                                                                                                                                                                                           |
|-----------------------------|-------------------------------------------------------------------------------------------------------------------------------------------------------------------------------------------------------------------------------------------------------------------------------------------------------------------------------------------------------------------------------------------|
|                             | <ul style="list-style-type: none"> <li>• patients receiving TNF inhibitor (TNFi).</li> </ul>                                                                                                                                                                                                                                                                                              |
| Genre F, et al. [91]        | <ul style="list-style-type: none"> <li>• Cardiovascular events,</li> <li>• diabetes mellitus,</li> <li>• chronic kidney disease,</li> <li>• IBD,</li> <li>• psoriasis.</li> </ul>                                                                                                                                                                                                         |
| Luchetti MM, et al. [92]    | <ul style="list-style-type: none"> <li>• TNF inhibitors upon entry in the study and/or for <math>\geq 3</math> months before the collection of biological samples,</li> <li>• use of cyclooxygenase-2 inhibitors, which could induce IBD flare, was not allowed, except occasionally for the relief of pain.</li> </ul>                                                                   |
| Perrotta FM, et al. [93]    | <ul style="list-style-type: none"> <li>• Age <math>\leq 18</math> years,</li> <li>• the presence of history of bone fractures in the previous 24 months,</li> <li>• no treatment with bisphosphonate agents.</li> </ul>                                                                                                                                                                   |
| Gercik O, et al. [94]       | <ul style="list-style-type: none"> <li>• Age <math>\leq 18</math> years,</li> <li>• pregnant or lactating,</li> <li>• end-stage renal disease,</li> <li>• malignant tumor,</li> <li>• cirrhosis,</li> <li>• hyperthyroidism,</li> <li>• hyperparathyroidism or Cushing's syndrome,</li> <li>• using tumor necrosis factor inhibitors (TNFi).</li> </ul>                                   |
| Iarenenko O, et al. [95]    | <ul style="list-style-type: none"> <li>• A history of the other rheumatic diseases,</li> <li>• spinal surgery,</li> <li>• spinal tumor.</li> </ul>                                                                                                                                                                                                                                        |
| Korkosz M, et al. [96]      | <ul style="list-style-type: none"> <li>• No data.</li> </ul>                                                                                                                                                                                                                                                                                                                              |
| Sun W, et al. [98]          | <ul style="list-style-type: none"> <li>• Low phosphorus rickets and osteoporosis with pathological fracture as well as malignant diseases.</li> </ul>                                                                                                                                                                                                                                     |
| Sakellariou GT, et al. [99] | <ul style="list-style-type: none"> <li>• History of osteoporosis,</li> <li>• severe liver or kidney dysfunction,</li> <li>• history of cardiovascular disease, diabetes mellitus or metabolic syndrome,</li> <li>• any malignancy,</li> <li>• previous use of biphosphonates or other anti-osteoporotic treatment,</li> <li>• use of glucocorticoids in the previous 6 months,</li> </ul> |

---

---

|                        |                                                                                                                                                                                                                                                                                                         |
|------------------------|---------------------------------------------------------------------------------------------------------------------------------------------------------------------------------------------------------------------------------------------------------------------------------------------------------|
|                        | <ul style="list-style-type: none"><li>• a high intake of non-steroidal anti-inflammatory drugs (NSAIDs) according to the recently proposed.</li></ul>                                                                                                                                                   |
| Taylan A, et al. [100] | <ul style="list-style-type: none"><li>• History of neuroendocrine disorder (thyroid, parathyroid disorder, and anticonvulsant usage),</li><li>• chronic renal and liver disease,</li><li>• systemic steroid usage, menopause,</li><li>• cigarette smoking,</li><li>• excessive alcohol usage.</li></ul> |
| Tuylu T, et al. [101]  | <ul style="list-style-type: none"><li>• Renal impairment (serum creatinine.1.4 mg/dl),</li><li>• patients who were treated with glucocorticoids during the previous four weeks.</li></ul>                                                                                                               |

---

**Supplementary materials – Table 1.** Summary of exclusion criteria.
